# Supplementary material for: Phthalate Esters Metabolic Strain Gordonia sp. GZ-YC7, a Potential Soil Degrader for High Concentration Di-(2-ethylhexyl) Phthalate
Source: MDPI journal article supplement (doi:10.3390/microorganisms10030641), 2022-03-17
Supplement: s1 [file s1]

**Table S1** Kinetic parameters of DEHP degradation

| DEHP (mg/L) | Kinetic equations            | $t_{1/2}$ (d) | $R^2$  |
|-------------|------------------------------|---------------|--------|
| 2000        | $\ln C = -0.01934t + 7.6001$ | 1.49334       | 0.9107 |
| 1000        | $\ln C = -0.03281t + 6.9013$ | 0.88025       | 0.9274 |
| 500         | $\ln C = -0.06471t + 6.1809$ | 0.44632       | 0.9076 |
| 200         | $\ln C = -0.06411t + 5.3237$ | 0.45049       | 0.8906 |

C: The concentration of DEHP at time t;  $t_{1/2}$ : half-life

**Table S2** The whole genome sequencing and assembly related information of *Gordonia* sp. GZ-YC7

| Platform | Insert Size | Reads Length | Raw Data | Adapter | Duplication | Total Reads | Filtered Reads | Low Quality Filtered | Clean Data |
|----------|-------------|--------------|----------|---------|-------------|-------------|----------------|----------------------|------------|
|          | (bp)        | (bp)         | (Mb)     | (%)     | (%)         |             | (%)            | Reads (%)            | (Mb)       |
| DNBSEQ   | 350         | (150:150)    | 1,314    | 0       | 0.02        | 8,764,210   | 0.07           | 0                    | 1,308      |

| Platform | Valid Zero-Mode   | Subreads Number | Subreads Total | Subreads Mean | Subreads | Subreads | Subreads Max | Subreads Min |
|----------|-------------------|-----------------|----------------|---------------|----------|----------|--------------|--------------|
|          | Waveguides Number |                 | Bases (bp)     | Length (bp)   | N50 (bp) | N90 (bp) | Length (bp)  | Length (bp)  |
| PacBio   | 34,772            | 248,485         | 2,525,005,289  | 10,161        | 11,060   | 6,917    | 150,259      | 2,000        |

**Table S3** Gene numbers of each category

| Category   | Gene number     |
|------------|-----------------|
| tRNA       | 51 (1.10 %)     |
| 5s rRNA    | 4 (0.09 %)      |
| 16s rRNA   | 4 (0.09 %)      |
| 23s rRNA   | 4 (0.09 %)      |
| sRNA       | 9 (0.19 %)      |
| VFDB       | 223 (4.79 %)    |
| ARDB       | 7 (0.15 %)      |
| TREMBL     | 4,476 (96.17 %) |
| CAZY       | 126 (2.70%)     |
| IPR        | 3,870 (83.15 %) |
| Swiss-Prot | 1,758 (37.77 %) |
| COG        | 3,463 (74.4 %)  |
| CARD       | 1 (0.02 %)      |
| GO         | 2,670 (57.37 %) |
| KEGG       | 2,400 (51.56 %) |
| NR         | 4,481 (96.28 %) |
| T3SS       | 1,026 (22.04 %) |

**Table S4** Esterase genes in previous publications

| Type | Ester         | Strains                                   | Reference |
|------|---------------|-------------------------------------------|-----------|
| I    | <i>dph</i>    | <i>Acinetobacter</i> sp. M673             | [50]      |
| I    | <i>EstS1</i>  | <i>Sulfobacillus acidophilus</i> DSM10332 | [2]       |
| I    | <i>EstSP1</i> | <i>Sphingomonas glacialis</i> PAMC 26605  | [45]      |
| II   | <i>mehpH</i>  | <i>Gordonia alkanivorans</i> YC-RL2       | [31]      |
| II   | <i>mehpH</i>  | <i>Gordonia</i> sp. P8219                 | [44]      |
| II   | <i>patE</i>   | <i>Rhodococcus jostii</i> RHA1            | [46]      |
| III  | <i>EstG</i>   | <i>Sphingobium</i> sp. SM42               | [47]      |
| III  | <i>CarEW</i>  | <i>Bacillus</i> sp. K91                   | [48]      |
| III  | <i>pehA</i>   | <i>Arthrobacter</i> sp. ZJUTW             | [30]      |
